# Supplementary material for: Cellulose Acetate–Ionic Liquid Blends as Potential Polymers for Efficient CO2 Separation Membranes
Source: MDPI journal article supplement (doi:10.3390/polym16040554), 2024-02-18
Supplement: s1 [file s1]

Supplementary Information for

# Cellulose Acetate-Ionic Liquid Blends as Membranes for Efficient CO<sub>2</sub> Separation

Giannis Kontos<sup>1</sup>, Costas Tsiptsias<sup>1,2\*</sup> and Ioannis Tsivintzelis<sup>1,\*</sup>

<sup>1</sup> Department of Chemical Engineering, Aristotle University of Thessaloniki, 54124 Thessaloniki, Greece

<sup>2</sup> Department of Chemical Engineering, University of Western Macedonia, 50132, Kozani, Greece

\* Correspondence: ktsiots@gmail.com (C.T.), tioannis@cheng.auth.gr (I.T.)

## S1. Commercial polymeric membranes used in industrial CO<sub>2</sub> separation processes

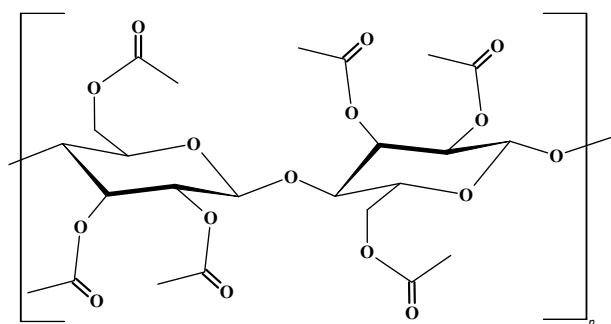

Cellulose triacetate, CTA

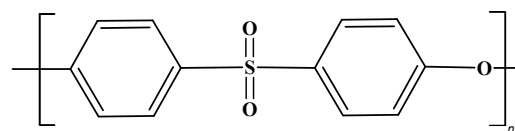

Victrex®, Ultrason® E

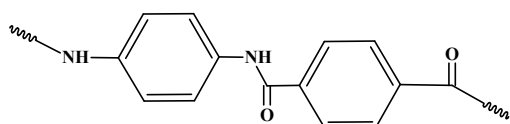

Kevlar®

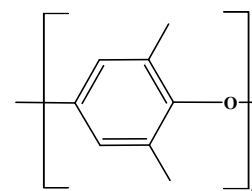

Poly (2,6-dimethyl-1,4-phenylene oxide), PPO

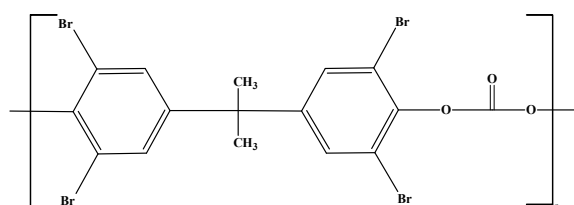

Tetrabromobisphenol A

**Figure S1.** Commercial polymeric membranes used in industrial CO<sub>2</sub> separation processes.

## S2. [Ch][Gly] synthesis

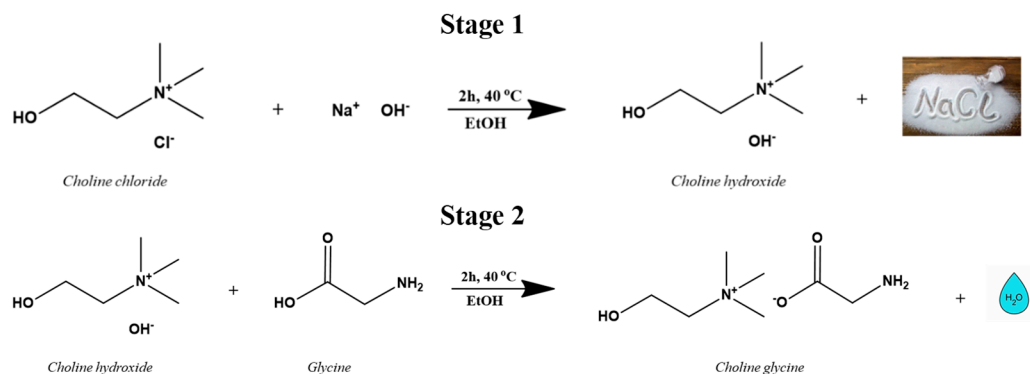

**Scheme 1.** Metathesis reaction between choline chloride,  $[\text{Ch}^+][\text{Cl}^-]$ , and sodium hydroxide,  $\text{NaOH}$ , in ethanol under stirring for 2 hours (Stage 1) and neutralization reaction between choline hydroxide,  $[\text{Ch}^+][\text{OH}^-]$ , and glycine, to form the desirable  $[\text{Ch}^+][\text{Gly}^-]$  IL and water as by-product (Stage 2).

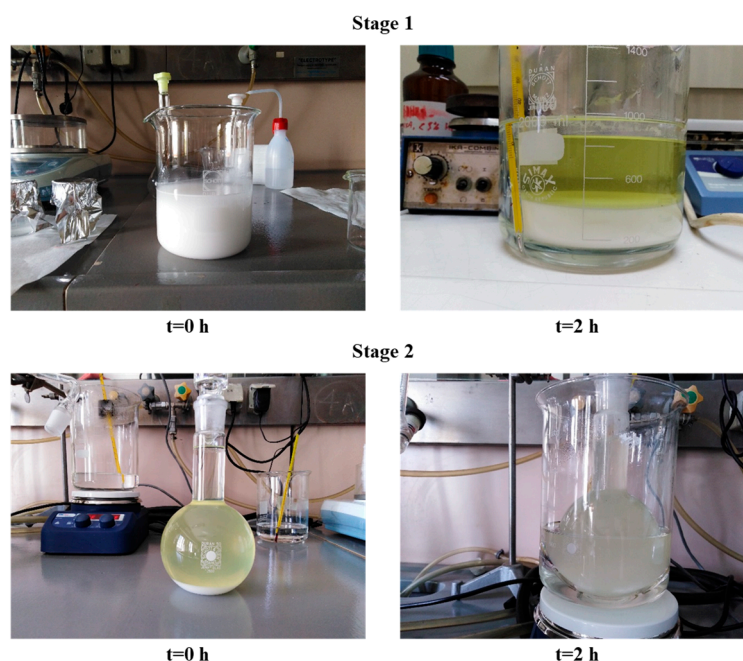

**Figure S2.** Choline chloride and sodium hydroxide in EtOH at  $t=0\text{h}$  and  $t=2\text{h}$ , note that  $\text{NaCl}$  precipitated as white powder (Stage 1) and choline hydroxide and glycine in EtOH at  $t=0\text{h}$  and  $t=2\text{h}$  (Stage 2).

$^1\text{H}$  and  $^{13}\text{C}$  NMR of the synthesized  $[\text{Ch}^+][\text{Cl}^-]$  was carried out at room temperature on a Varian 600 MHz spectrometer in  $\text{D}_2\text{O}$  with tetramethylsilane as internal standard. NMR data is reported as s = singlet, d = doublet, t = triplet, q = quatrilplet and m = multiplet or unresolved, while chemical shifts ( $\delta$ ) values are given in ppm. The chemical shifts at 3.49–3.56 ppm (2H, m,  $\text{CH}_2\text{OH}$ ), 4.03–4.10 ppm (2H, m,  $\text{CH}_2\text{CH}_2\text{N}$ ) and 3.21 ppm (9H, s,  $(\text{CH}_3)_3\text{N}$ ) originate from choline cation, whereas the signal at 3.26 ppm (2H, s,  $\text{CH}_2\text{NH}_2$ ) from glycine anion (Figure S3). These results are consistent with literature findings [1–3]. Similar information can also be obtained from  $^{13}\text{C}$  NMR analysis. The signals at 56.71 ppm ( $\text{CH}_2\text{OH}$ ), 70.33 ppm ( $\text{CH}_2\text{CH}_2\text{N}$ ) and 58.44 ppm ( $(\text{CH}_3)_3\text{N}$ ) are attributed to the carbon atoms of the choline cation, while those at 46.80 ppm ( $\text{CH}_2\text{NH}_2$ ) and 182.82 ppm ( $\text{C}=\text{O}$ ) to

carbons atoms of the glycine anion (Figure S4). These results are, also, in good agreement with the literature [2].

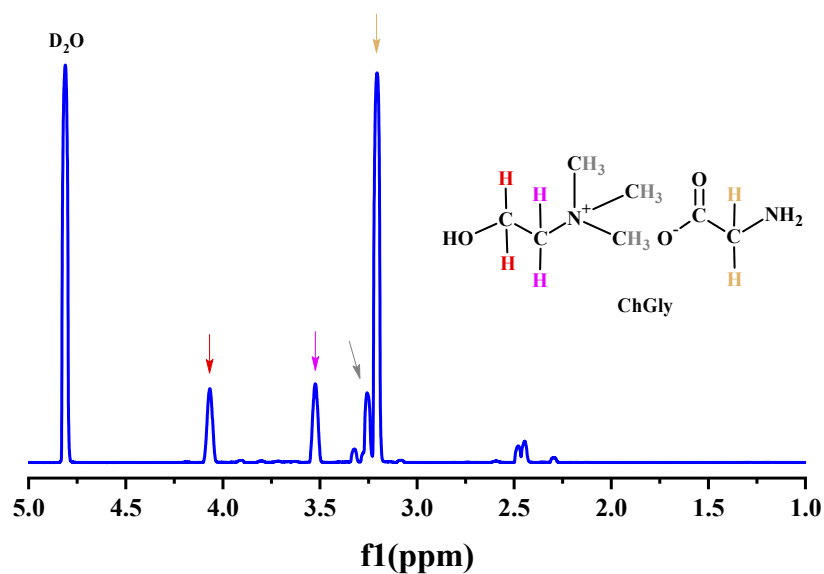

**Figure S3.**  $^1\text{H}$  NMR spectra of the synthesized  $[\text{Ch}^+][\text{Gly}^-]$  in  $\text{D}_2\text{O}$ .

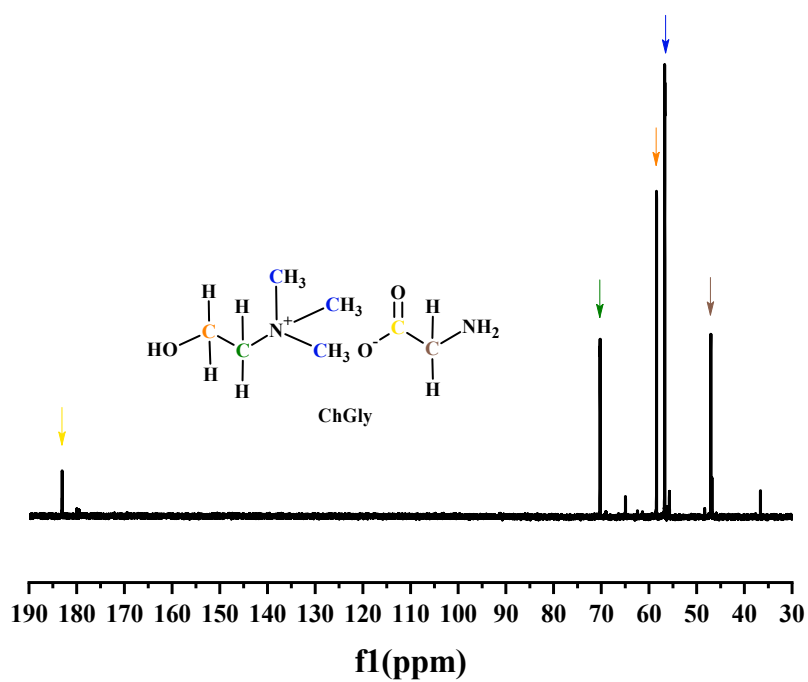

**Figure S4.**  $^{13}\text{C}$  NMR spectra of the synthesized  $[\text{Ch}^+][\text{Gly}^-]$  in  $\text{D}_2\text{O}$ .

### S3. CA-IL films preparation

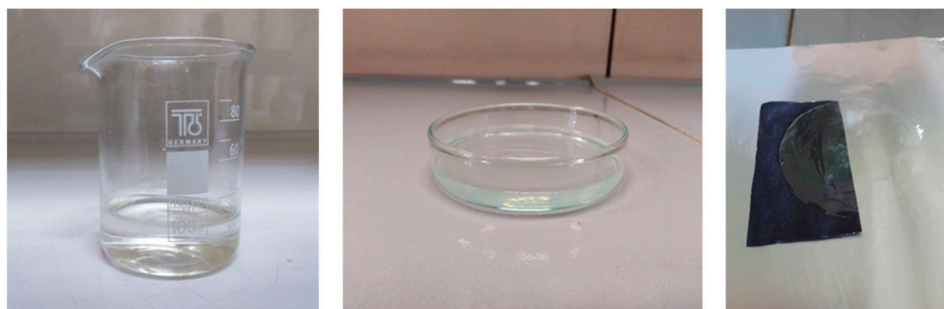

**Figure S5.** Composite membrane films preparation using the solution casting method.

#### S4. CO<sub>2</sub> and N<sub>2</sub> sorption measurements using mass loss analysis (MLA)

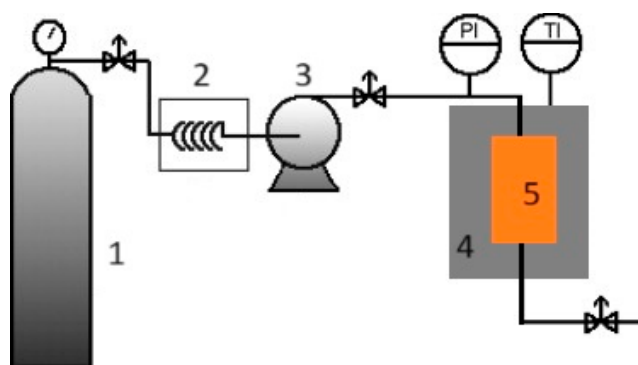

**Figure S6.** Sketch of the experimental setup that was used for the sorption measurements. 1: High pressure gas tank; 2: cooler; 3: syringe pump; 4: oven; 5: high pressure cell.

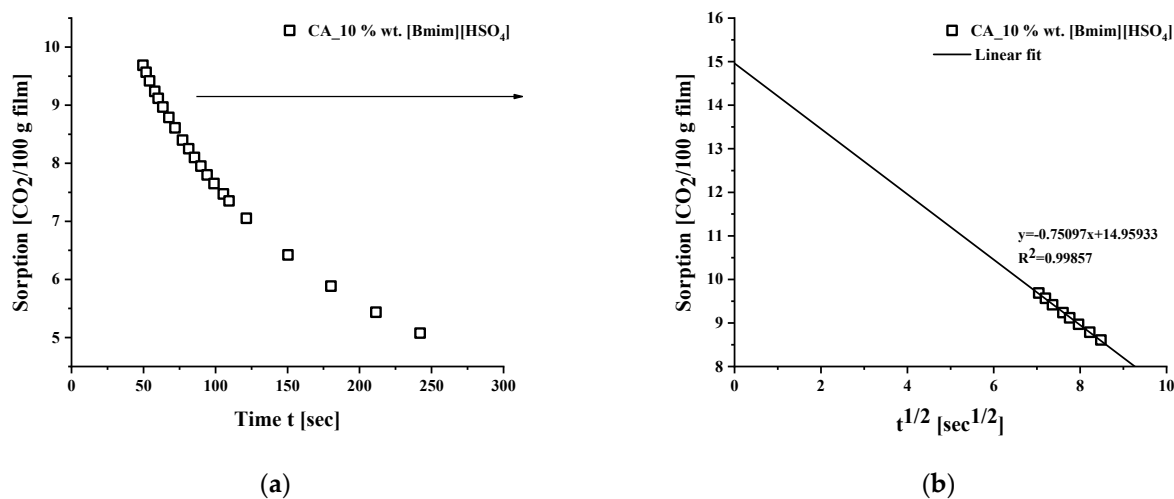

**Figure S7.** CO<sub>2</sub> desorption from CA doped with 10% wt. [Bmim]<sup>+</sup>[HSO<sub>4</sub><sup>-</sup>] at 25°C and atmospheric pressure after exposure at a CO<sub>2</sub> atmosphere at 35°C and 40 bar (a) and extrapolation to time zero using the FD model (b).

#### S5. Degree of crystallinity calculation of the CA-IL films using XRD analysis

After subtraction of a linear background, the experimental diffraction curve was resolved into a crystalline peak and an amorphous halo by fitting a theoretical curve. Both the crystalline peak and the amorphous halo were represented by a Gaussian distribution (Figure

S8). The degree of crystallinity was calculated as the ratio of the area of the crystalline peak to the total area [5,6].

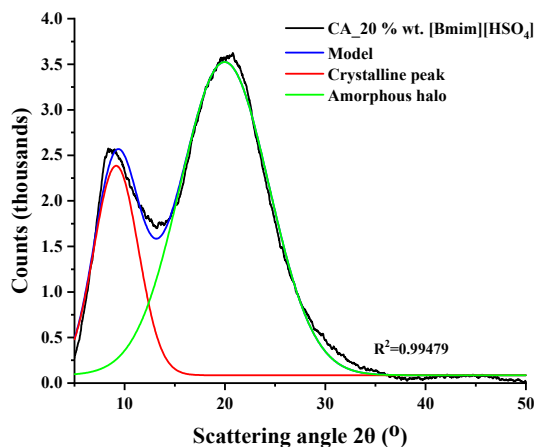

**Figure S8.** Degree of crystallinity calculation of the CA doped with 20% wt. [Bmim<sup>+</sup>][HSO<sub>4</sub><sup>-</sup>] using Gaussian function to determine the crystalline peak and the amorphous halo.

## References

1. Liu, Q.-P.; Hou, X.-D.; Li, N.; Zong, M.-H. Ionic liquids from renewable biomaterials: synthesis, characterization and application in the pretreatment of biomass. *Green Chemistry* **2012**, *14*, 304–307.
2. Moriel, P.; García-Suárez, E.J.; Martínez, M.; García, A.B.; Montes-Morán, M.A.; Calvino-Casilda, V.; Bañares, M.A. Synthesis, characterization, and catalytic activity of ionic liquids based on biosources. *Tetrahedron Letters* **2010**, *51*, 4877–4881.
3. Yuan, S.; Yang, Z.; Ji, X.; Chen, Y.; Sun, Y.; Lu, X. CO<sub>2</sub> absorption in mixed aqueous solution of MDEA and cholinium glycinate. *Energy & Fuels* **2017**, *31*, 7325–7333.
4. Felder, R.; Huvard, G. 17. Permeation, diffusion, and sorption of gases and vapors. In *Methods in experimental physics*; Elsevier: 1980; Volume 16, pp. 315–377.
5. Hermans, P.; Weidinger, A. Estimation of crystallinity of some polymers from x-ray intensity measurements. *Journal of Polymer Science* **1949**, *4*, 709–723.
6. Krimm, S.; Tobolsky, A.V. Quantitative x-ray studies of order in amorphous and crystalline polymers. Quantitative x-ray determination of crystallinity in polyethylene. *Journal of Polymer Science* **1951**, *7*, 57–76.
